# Supplementary material for: Detection of landslide timing, reactivation and precursory motion during the 2018, Lombok, Indonesia earthquake sequence with Sentinel-1
Source: Copernicus journal article supplement (doi:10.5194/egusphere-2024-3264), 2024-12-04
Supplement: Supplementary file [file egusphere-2024-3264-AC2-supplement.pdf]

## Responses to reviewer 1 comments

This manuscript provides an interesting research into the use of Sentinel-1 SAR data to accurately identify the timing of earthquake-triggered landslides, their reactivations and potential precursory motions. The authors apply a combination of amplitude and coherence-based timing detection methodologies on the 2018 Lombok, Indonesia earthquake sequence which results in a multi-temporal inventory. This then allows them to interpret the different triggering conditions of new and reactivated landslides.

I believe this study is very interesting, the techniques are very relevant, and could have potential to be adapted to also identify timing of rainfall-triggered landslides. However, I think this manuscript could benefit from additional considerations on the methods and writing. My specific comments and line-by-line comments are attached as supplement. These comments mainly come down to the following main points:

- The objectives of this paper are not that clear from the introduction. I believe that the introduction would benefit from a clear presentation of the aims and objectives of the manuscript. Currently it does not become clear that the coherence matrix approach is a novel technique in this context which you are going to explore the usage of. This has implications on the timing results and the interpretability of them.

The final paragraph of the introduction has been updated to better present the novelty of the coherence matrix approach for studying landslide activity

*"We also demonstrate that for some landslides, an InSAR coherence matrix approach can be used not only to constrain the timing of new landslides, but also to detect multi-stage failure such as reactivations (i.e. complete failure on one date followed by further failure within or connected to the landslide at a later date) and precursory motion (i.e. displacement on one date followed by complete failure of the same area at a later date)."*

At lines 39-44 of the original manuscript has been changed in the revised manuscript to:

*"We use the amplitude-based method of Burrows et al. (2022) to constrain the failure timing of new landslides. We also explore an approach based on interferometric SAR (InSAR) coherence matrices, a technique that has successfully been applied in landcover mapping (Giffard-Roisin et al. 2022; Jacob et al. 2020), but not yet tested for landslide timing. Here, we identify landslides where this method appears to identify multi-stage failure such as reactivations (i.e. complete failure on one date followed by further failure within or connected to the landslide at a later date) and precursory motion (i.e. displacement on one date followed by complete failure of the same area at a later date)."*

- Given that the coherence matrix approach is a novel methodology for landslide timing detection, I believe this requires comprehensive analysis on the ability to use it for this purpose. This currently seems to be lacking. For example, once you identify timing, you seem to be 100% sure about the validity. Partly from these timings you then derive conclusions on precursory motion and reactivation. There seem to be little discussion about the actual uncertainties related to those timings and the constraints it puts on the results. What is the effect of noise? In addition, the coherence product has a relatively large spatial resolution. It is unclear how this spatial resolution affects the ability to use this product in your method. I can imagine that mixed pixels might play an important role. Given that you propose a new method, perhaps somehow a sensitivity analysis on the effect of landslide size on the ability

to detect changes could be beneficial, especially when others want to use a similar technique.

Large landslides are more likely to be assigned a timing using InSAR coherence. We have carried out an analysis of this and added information on the sensitivity of the InSAR coherence methods to Section 3.2. Thank you for suggesting that we add this information *“Within the landslides examined, larger landslides were more likely to be assigned a timing by the InSAR coherence methods than smaller landslides. The inventory of Ferrario contained 87 landslides > 10000 m<sup>2</sup>, 38 in the range 8000-10000 m<sup>2</sup>, 75 in the range 6000-8000 and 171 in the range 3960-6000 m<sup>2</sup> of which 70 (80%), 25 (66%), 46 (61%) and 86 (50%) were assigned a timing respectively.”*

- You use a very limited amount of landslides compared to the complete inventory and derive general conclusions on the triggering conditions of new and reactivated landslides. Are these results representative? I think this should be addressed and put into perspective.

Yes, large landslides are over-represented in these data. This has been added to Section 3.2 (see response to previous comment for text change). A reference to this has been added to the discussion section at line 301 of the original manuscript as follows:

*“This observation primarily applies to large landslides, since these are more likely to be assigned a timing by both the amplitude (Burrows et al. 2022) and coherence (Sect. 3.2) methods.”*

And in the conclusion

*“We have demonstrated that when a coherence matrix approach is used, we can detect not only single failures but also reactivations and thus build a more complete picture of landslide activity, although such methods cannot be applied to all landslides.”*

Has been changed to *“We have assessed a new method for landslide timing detection based on InSAR coherence matrices. This approach, which is mainly applicable to larger events, can detect not only single failures but also reactivations and thus build a more complete picture of landslide activity.”*

- I believe that there are some structural changes that could improve the manuscript: (1) I think it is more relevant to first describe the SAR datasets (current section 2.3) before diving into the detection methodologies (current section 2.2). This will allow to introduce all the concepts that you will be talking about during the detection methodologies section. (2) Section 4.1 seems to consist of a mix of methodology and results that I think would better fit in the methods and results sections.

(1) As you suggest, we have exchanged the order of these two sections

(2) Lines 281-294 of the original manuscript have been moved to the methods section. However, we have kept the rest of Section 4.1 in the Discussion rather than moving it to the results as this is not an additional result, but instead builds on the results of the paper.

*“Using the information on landslide evolution through time derived from SAR, we were able to consider the conditions under which new landslides and reactivations were triggered (Section 4.1). For this analysis, estimates of PGV experienced during each earthquake were obtained from the USGS Shakemap webpage (USGS, 2018a, b, c, d). For 19/08, we took the maximum PGV experienced by each landslide during the Mw 5.8, 6.3 and 6.9 earthquakes. In*

*the majority of cases, this was the PGV of the Mw 6.9 earthquake. Slope was calculated from the 30 m Copernicus digital elevation model in Google Earth Engine and the maximum value was taken within each landslide polygon.*

*The landslide probability under these conditions can be estimated with the logistic regression model of Nowicki Jessee et al. (2018) using regression coefficients derived in that study for a global database of landslides. For lithology, we used the coefficient derived for intermediate volcanics, which comprise the majority of the study area according to the global lithological map of Hartmann and Moosdorf (2012) and for landcover, closed deciduous forest, which is the landcover type shared by most of the landslides (Dossa et al., 2013). Although lithology and landcover also affect landslide susceptibility, we do not attempt to control for these: lithology does not vary much across the study area, particularly since many new landslides and reactivations occur on the same scars and so at the same locations. Differences in landcover between landslides is too difficult to account for since the landslides themselves mean that it changes through time.”* Has been added as section 2.5 in the revised manuscript.

- It is not very clear which precursory motions and reactivations have been validated through optical data. This seems essential for the applicability of the methods and the interpretability of the results later.

For reactivations, this information is in the final column of table 1. For precursory movements, we could only assess this in one or two cases due to the lack of optical imagery after the first earthquake. It is for this reason, that we suggest that more research is needed. Figure 3 of the revised manuscript shows an additional example of a landslide reactivation that has been detected in coherence matrix (Part of this figure was in figure 2 of the original manuscript)

- Figures should be improved, legends, scale and axis-labels are sometimes missing,

We have made the improvements to the figures that you suggest throughout this review. We have also divided Figure 2 of the original manuscript into two separate figures that show (i) the spatial correlation between the signal seen in the coherence and landslides (in Fig. 2 of the revised manuscript and (ii) example of landslide reactivation seen in both multi-spectral imagery and InSAR coherence

Specific comments Abstract:

❖ To me it is not clear what methodology you have used. Is it a new methodology? And if so, did it work accurately? I think you could be more accurate in that.

To make clearer the methodology used and to specify its novelty, we have made the following change

*“Sentinel-1 techniques”* has been changed to *“Sentinel-1 amplitude and a new coherence-based method”* at line 2. Although the accuracy of the methods is explored in the paper, we do not include it in the introduction.

❖ I think you can be more transparent in how representative the results are, especially considering that you only analyze a fraction of all landslides within the inventory. Are these results representative for the whole event?

It is true that the methods only work for a subset of landslides and this was not made clear in the previous version of the abstract. To address this, we have added the text in bold to the following sentence. *“Overall, we demonstrate that, **although they are not sensitive to all landslides**, Sentinel-1 amplitude and coherence are valuable tools to study how landslide hazard and mass wasting evolve during sequences of triggers.”*

#### Specific comments Introduction

❖ I believe that a more elaborated introduction on the SAR methodologies and the novelty of your work in regards to that would be relevant (around lines 36-39). Also, in the next line you mention InSAR coherence, but this has not been introduced yet (line 40).

*We also demonstrate that for some landslides, an InSAR coherence matrix approach can be used not only to constrain the timing of new landslides, but also to detect multi-stage failure such as reactivations (i.e. complete failure on one date followed by further failure within or connected to the landslide at a later date) and precursory motion (i.e. displacement on one date followed by complete failure of the same area at a later date).*

Changed to:

*We use the amplitude-based method of Burrows et al. (2022) to constrain the failure timing of new landslides. We also explore an approach based on interferometric SAR (InSAR) coherence matrices, a technique that has successfully been applied in landcover mapping (Giffard-Roisin et al. 2022; Jacob et al. 2020), but not yet tested for landslide timing. Here, we identify landslides where this method appears to identify multi-stage failure such as reactivations (i.e. complete failure on one date followed by further failure within or connected to the landslide at a later date) and precursory motion (i.e. displacement on one date followed by complete failure of the same area at a later date).*

❖ From line 39 onwards it starts to read like a conclusion, while I think a presentation of aim and objectives is more suitable. Is the aim to create a methodology to identify precursory and reactivation? Or, are you going to use old methodologies and identify their suitability in identifying that? Or, is the point more process-based and you want to understand the occurrence of landslides as a result of this earthquake sequence?

The text from line 39-44 is included so that the reader will know what they can expect to find in the paper. However, we believe the change made in response to your previous comment better highlights the novelty of the coherence matrix approach, which has not previously been used for landslide timing.

#### Specific comments Data and Methods

❖ To me it seems more relevant to discuss SAR data and processing (section 2.3) before the SAR detection methodologies (section 2.2). I think it is better to first properly introduce the SAR products and their properties, and how landsliding influence this signal before mentioning the detection methodologies. You have mentioned amplitude and coherence before, but what exactly consist of is unclear until section 2.3. I think a better structure and separation is relevant.

*We have reordered Sections 2.2 and 2.3 as you suggest*

❖ Figure 1 could use some adjustments to increase readability:

- o Inlay of location with respect to larger area needed.

o Fig. 1b could be improved visually. Needs x-axis + label. I find the forward and backslash a bit strange. Perhaps you can use a straight line with different colors, or patterns? In addition, I think a better distinction for the division in time between the two inventories for example by using different background colors (same as you use in fig1 a) would be relevant.

o Perhaps nice and informative to add an elevation map in Fig. 1a

Thank you for these suggestions. We have made the recommended alterations to this figure and amended the caption.

❖ The reason for only taking landslides  $> 2.000\text{m}^2$  during amplitude analysis and  $>3.600\text{m}^2$  during coherence analysis is not well explained. Why  $2.000\text{m}^2$  where amplitude resolution is  $20 \times 22\text{ m}$  ( $440\text{m}^2$ ) and  $3.600\text{m}^2$  where coherence is  $60 \times 66\text{m}$  ( $3.960\text{m}^2$ ). This means that coherence resolution is lower than some landslide events?

For the amplitude methods, it is necessary to have multiple pixels within the landslide polygon to calculate the metrics (e.g. pixel variability) used by Burrows et al. (2022). Therefore, the polygon needs to be larger than  $440\text{ m}^2$ . An analysis of the effect of landslide size on the sensitivity of the method was carried out in that paper.

Text changed at line 101 of the original manuscript from *“These metrics, particularly those relating to geometric shadows and bright spots, work best in forested areas and can be applied to medium-large landslides ( $> 2000\text{ m}^2$ ).”* to *“These metrics, particularly those relating to geometric shadows and bright spots work best in forested areas. The method is limited to landslides  $> 2000\text{ m}^2$  so that each polygon contains enough pixels to calculate metrics (e.g. pixel variability) and is more sensitive for larger landslides (Burrows et al. 2022).”*

For the coherence, you are right that  $3960$  would be a more logical cutoff. In fact,  $3960$  was the cutoff that was used in the analysis and  $3600$  is a mistake in the written manuscript which will be altered in the revised version at lines 73,191,239, 257 of the original draft and in the caption of Figure 3

❖ Following previous point: Particularly for coherence you have a rather low resolution. How does this influence the detection results? Does this mean that some landslides are only covered by one pixel? How does that work with mixed pixels? This could be the case for many landslides right? How does this influence your methodology? This is not really mentioned. In addition to that, I believe that presenting the size distribution of your inventory is important for the interpretation of the results and their accuracy.

The resolution (i.e. the smallest resolvable object) of a coherence map is coarser than the pixel size of the coherence map because of the moving window used in the coherence calculation. Large landslides are more likely to be assigned a timing using InSAR coherence. Information on how the sensitivity of the InSAR coherence methods varies with respect to landslide size has been added to Section 3.2

*“Within the landslides examined, larger landslides were more likely to be assigned a timing by the InSAR coherence methods than smaller landslides. The inventory of Ferrario contained 87 landslides  $> 10000\text{ m}^2$ , 38 in the range  $8000\text{-}10000\text{ m}^2$ , 75 in the range  $6000\text{-}8000$  and 171 in the range  $3960\text{-}6000\text{ m}^2$  of which 70 (80\%), 25 (66\%), 46 (61\%) and 86 (50\%) were assigned a timing respectively.”*

❖ I'm also curious why you use a low coherence resolution. A moving window not necessarily reduces the resolution of coherence?

The smallest resolvable cell of a coherence map is coarser than that of the SAR image because the moving window used to calculate coherence has a blurring effect. Therefore the moving window reduces the resolution of the coherence compared to the interferogram or to amplitude images.

❖ Since you are proposing a new application of a methodology using the coherence I think this requires some sort of a sensitivity analysis. Given that the land cover is more or less the same, it would be interesting to see the accuracy in regards to size.

Large landslides are more likely to be assigned a timing using InSAR coherence. Information on the sensitivity of the InSAR coherence methods has been added to Section 3.2. Thank you for suggesting this

*"Within the landslides examined, larger landslides were more likely to be assigned a timing by the InSAR coherence methods than smaller landslides. The inventory of Ferrario contained 87 landslides > 10000 m<sup>2</sup>, 38 in the range 8000-10000 m<sup>2</sup>, 75 in the range 6000-8000 and 171 in the range 3960-6000 m<sup>2</sup> of which 70 (80%), 25 (66%), 46 (61%) and 86 (50%) were assigned a timing respectively."*

❖ In the end you use less than 10% (after size threshold) of the complete inventory. I think this will affect the interpretability of the results, but this is not really mentioned specifically.

The change we have made in response to your previous comment details the percentage of landslides that are timed by InSAR coherence and how this varies according to landslide area.

We have also added the following text at line 301 of the original manuscript to make clear that our interpretation is based on larger events

*"This observation primarily applies to large landslides, since these are more likely to be assigned a timing by both the amplitude (Burrows et al. 2022) and coherence (Sect. 3.2) methods."*

And changed the following text in the conclusions:

*"We have demonstrated that when a coherence matrix approach is used, we can detect not only single failures but also reactivations and thus build a more complete picture of landslide activity, although such methods cannot be applied to all landslides."*

Changed to *"We have assessed a new method for landslide timing detection based on InSAR coherence matrices. This approach, which is mainly applicable to larger events, can detect not only single failures but also reactivations and thus build a more complete picture of landslide activity."*

❖ How it is currently written, I do not fully agree with your reasoning to not use optical data (line 96) in the methodology. Cloud cover does not necessarily have to cover the full event completely. There could always be some cloud free spots, especially in regards to earthquake-triggered landslides (where rainfall doesn't play a major factor). This information can be used and does not necessarily rule out the use of optical.

The landslides triggered by this event have already been studied using optical satellite imagery and the aim here was to complement these pre-existing analyses, particularly that of Ferrario (2019) using InSAR coherence and SAR amplitude. However we have made the following change to make this clearer:



*“Due to prevalent cloud cover in our study area and the fact that the landslides are already somewhat constrained in time since the earthquake timings are known a-priori, we did not expect using optical imagery to offer an advantage here, so we used the method presented in Burrows et al. (2022). This method uses time series of four metrics”* at line 95 of the original manuscript changed to *“The 2018 Lombok, Indonesia earthquake sequence has previously been studied using optical satellite imagery, and it was found that cloud cover during the sequence presented a significant limitation, particularly in differentiating between landslides triggered during the first two earthquakes (Ferrario, 2019). Therefore, here we use the SAR-amplitude method of Burrows et al. 2022, which uses time series of four metrics”*

❖ Rainfall could also play a role in influencing the amplitude and coherence values. Was there any (heavy) rain during the sequence that could have influenced the results?

Not during the earthquake sequence itself. The earthquake sequence occurred during Indonesia’s dry season and with little recorded rainfall in August (Ferrario, 2019)

*“This highlights the fact that there are some events for which coherence analysis may be inherently unsuitable”* at line 452 of the original manuscript has been changed to *“The earthquake sequence occurred during the dry season in Indonesia, with little rainfall recorded during the month of August (Ferrario, 2019). However, this sensitivity to soil moisture changes means that there are some events for which coherence analysis may be inherently unsuitable,”* in the revised manuscript.

❖ For figure 2. It seems like the coherence of element (13,14) that indicates post-event stable conditions and element (9,10) that indicates reactivation are almost similar to each other? What does that mean?

This similarity in absolute coherence value for individual coherence maps is why we use the full coherence matrix rather than individual time series. While there is some variation in coherence that is not caused by landslides, the fact that coherence is lower for all the interferograms that span a given earthquake is what indicates that the landslide failed at that time.

New text at line 141 of the revised manuscript *“This allows us to better differentiate between coherence loss due to earthquake-induced landslide activity and coherence loss due to other factors, such as acquisition geometry.”*

❖ What polarization are you using and why? I think this needs some elaboration.

We are using vertically polarised SAR images. You are right, this information was missing from the manuscript. We have added it at line 181 of the original manuscript

*“Vertically polarised (VV) imagery was used, since these data are sensitive to land-cover changes in vegetated areas and have been widely used in coherence- and amplitude-based landslide detection methods (e.g. Burrows et al. 2022; Deijns et al. 2022).”*

Specific comments Results

❖ To me it is rather unclear if (and for which landslides) the SAR-based precursory or reactivation conclusions are validated using optical imagery. Now it reads like this is not really the case. Can this difference in timing be explained by inaccuracies of the methodology? Potential noise? Basically, how reliable are these results? I would like to see a figure where it becomes clear the reactivation or precursory movement defined by SAR products is in fact actual precursory movement or a reactivation. From table 1 to me this doesn’t become really clear.

Examples of the correspondence between the matrix and preliminary failure/ reactivations are given in figures 3 (new) and 6 (previously 5) of the revised document. Hopefully this will better support our interpretation.

❖ You mention that you are only able to derive only a portion of the landslides. Why is this? I think this is relevant needed information.

The landslide timing is only kept if the signal is strong enough. Landslides without a strong enough signal could be in areas of the interferogram with low background coherence (making the coherence loss due to the landslide relatively small) or in areas highly sensitive to geometric decorrelation (introducing noise). This was described at lines 175-176 of the original manuscript, but we have added the text in bold to make this clearer

*“We chose a minimum threshold of 1.5 standard deviations in order to maximise the accuracy of the method. Raising this threshold beyond 1.5 reduced the number of timed landslides without improving the accuracy (Fig. A2). **For this reason, we do not obtain timing information for all landslides**”.*

❖ I have to say that I was a bit confused by the mentioning of all these landslide timing detection numbers throughout sections 3.1-3.3. A visual would probably help with the interpretation. Maybe a better back and forth with figure 3 could benefit this?

Referring to Figure 3 during Sections 3.1 and 3.2 is not possible, since this figure shows the landslide timing information we can obtain by combining amplitude and coherence (i.e. section 3.3). We believe the numbers are necessary to report the results.

❖ As a suggestive question: In the end I wonder about the use of SAR if there is only ~30% (of the 10% of the total inventory) that can be detected. Were you able to identify more accurately using optical (even if it is manual of course)? Perhaps there is many landslides that now have a more accurate timing using optical than SAR? Mentioning this could increase transparency in regards to the applicability of the methods used.

In some cases it may be possible to time more with optical, but the advantage of the SAR is that we have consistency in time (i.e. every landslide that we are able to time is constrained to a 6-day window). For example, here, we would struggle to differentiate between the 3<sup>rd</sup> and 4<sup>th</sup> earthquakes in the sequence because the imagery between these two is especially cloudy. Timed landslides are also likely to be clustered in space due to gaps in cloud cover and less visible in unvegetated areas. Additionally, the SAR methods are likely to be more useful in the future when more SAR satellites (e.g. NISAR, ROSE-L) with regular acquisition strategies have been launched.

Given the analysis on the impact of landslide size that we have added based on you other comments, we suggest that SAR amplitude is useful for medium-large landslides (>2000), while InSAR coherence is more useful for large landslides.

New text at line 411 of original manuscript *“However, there are limitations, particularly in terms of landslide size, that impact the applicability of the methods. Altogether, we obtained timings for a relatively limited portion of the landslide inventory of Ferrario, 2019. The number of landslides that it is possible to constrain the timing of may improve in the future by incorporating data from planned SAR satellites with regular acquisition strategies such as NiSAR and ROSE-L missions (Jones et al. 2021, Davidson et al. 2021).”*

❖ You seem to assume that when the timing is done, the estimation is 100% correct. The reasoning for this is not clearly explained, what is the uncertainty in this? For example, in line 248 you mention



with certainty that they have to be reactivations. Is this really true? No noise at all? Can it just be that the timing detection is wrong? Especially considering that the coherence doesn't always work correctly as you mention 252-253. I think this is an important aspect to address.

It is difficult to know exactly the accuracy of the InSAR coherence methods since the optical is an imperfect record of landslide reactivation and precursory movements. When the InSAR coherence and optical disagree, this may be due to the InSAR coherence detecting something that is not visible in the optical. This is discussed in Section 4.4, but we have amended this part of the results section and point the reader to this section in the revised version.

*“Possible explanations of the disagreement between the optical and InSAR coherence results are discussed further in Sect. 4.4.” at line 253 of the original manuscript changed to “If the optical data is assumed to be correct, the accuracy of the InSAR coherence methods thus appears to be 72-80%. However some cases where the optical and SAR disagree may be due to differences in what the two datasets are sensitive to. This is explored further in Sect. 4.4.” in the revised manuscript.*

❖ Fig 3:

o Fig. 3f to improve readability maybe increase the size of the circles proportionally

The size of panel f has been increased accordingly

o Fig. 3f, should 112 be 113? Then 258 adds up to 371 as mentioned in line 261

Yes that is correct, thank you for catching this mistake. We have changed 112 to 113 in the figure caption

o I think you should add a reference to the PGA data of the USGS

A reference to USGS shakemap has been added to the figure caption

Specific comments Discussion

❖ The first two paragraphs under line 278-293 would probably better fit in the method section rather than discussion. In addition, the rest of section 4.1 would better fit in the results section.

Lines 281-294 of the original manuscript have been moved to the methods section. However, we have kept the rest of Section 4.1 in the Discussion rather than moving it to the results as this is not an additional result, but instead builds on the results of the paper.

*“Using the information on landslide evolution through time derived from SAR, we were able to consider the conditions under which new landslides and reactivations were triggered (Section 4.1). For this analysis, estimates of PGV experienced during each earthquake were obtained from the USGS Shakemap webpage (USGS, 2018a, b, c, d). For 19/08, we took the maximum PGV experienced by each landslide during the Mw 5.8, 6.3 and 6.9 earthquakes. In the majority of cases, this was the PGV of the Mw 6.9 earthquake. Slope was calculated from the 30 m Copernicus digital elevation model in Google Earth Engine and the maximum value was taken within each landslide polygon.*

*The landslide probability under these conditions can be estimated with the logistic regression model of Nowicki Jessee et al. (2018) using regression coefficients derived in that study for a global database of landslides. For lithology, we used the coefficient derived for intermediate volcanics, which comprise the majority of the study area according to the global lithological map of Hartmann and Moosdorf (2012) and for landcover, closed deciduous forest, which is the landcover type shared by most of the landslides (Dossa et al., 2013). Although lithology and landcover also affect landslide*

*susceptibility, we do not attempt to control for these: lithology does not vary much across the study area, particularly since many new landslides and reactivations occur on the same scars and so at the same locations. Differences in landcover between landslides is too difficult to account for since the landslides themselves mean that it changes through time.”* Added as section 2.5 in the revised manuscript.

❖ Fig 4:

o Fig4c legend needed, what do the colors represent?

The colours represent the 4 earthquakes as in panels (a) and (b) with darker tones indicating a higher prevalence of the slope and PGV in the 2D histogram

o Fig4c why not subdividing them into new and reactivations as well?

These are not histograms of landslides but histograms of the whole study area. Thus new and reactivation cannot be differentiated. This is clarified in the figure caption and the axes have been made more readable.

o the yellow color is not properly readable

This colour has been darkened in the revised version to improve visibility

The following changes have been made to figure 4 (figure 5 in the revised document):

*“2D histograms of Slope and PGV across the study area during each earthquake.”* changed to *“2D histograms of Slope and PGV during each earthquake. Darker tones indicate a higher prevalence across the study area”* in the figure caption.

Yellow colour has been darkened to improve readability

Axis labels in panel c have had font size increased to improve readability.

❖ I think the representativeness of the results should be discussed. Your results do not include smaller landslides and they only consist of a fraction of all the events.

To address this comment, we have added new text at line 411 of original manuscript *“However, there are limitations, particularly in terms of landslide size, that impact the applicability of the methods. Altogether, we obtained timings for a relatively limited portion of the landslide inventory of Ferrario, 2019. The number of landslides that it is possible to constrain the timing of may improve in the future by incorporating data from planned SAR satellites with regular acquisition strategies such as NiSAR and ROSE-L missions (Jones et al. 2021, Davidson et al. 2021).”*

❖ Figure 5:

o Adding a scale bar seems essential for the interpretation in relation with coherence resolution.

o No x-label and y-label for 5e, and no x-label for the legend

Changes made to figure 5 (fig. 6 in revised document)

- Scale bar added to panels a-d
- Label added to legend of 5e
- X and y axes labelled as “Time” as in Figure 2

❖ In line with previous comments, I'm not entirely convinced that this coherence change indicates precursor movement, my main concerns being:

o How does the resolution affect these processes, especially given that you have quite a low coherence resolution? Also, how does the mixing signal in pixels influence this?

This landslide polygon is large in size, a scale bar has been added to the figure to better show this

o Isn't there any uncertainty in the coherence based timing? The uncertainty is low since the timings have to be tied to an earthquake. The accuracy of the methods is already discussed in the results section.

o Wouldn't you need a longer time series, to derive a trend (like Dini et al., 2022 and Jacquemart & Tiampo, 2021)? Perhaps it is just a noisy image? Maybe there is still some effect of local clouds, or local rainfall?

It is true we cannot say that it is definitely precursory movement, that is why the section is titled "**Possible** detection of precursory motion during the 28/07 earthquake". However, it is unlikely to have been caused by rainfall since there was very little rainfall during the month of August. It is also unlikely to be just a noisy image since the coherence loss is not seen for every landslide polygon.

Using a longer time series is not feasible since we are not seeing a slow acceleration to failure as in those studies but two periods of movement (in eqs 1 and 2). The movement in eq1 is considered precursory because it is not visible in the optical yet.

Changes made:

- Information on rainfall during the earthquake sequence has been added to the revised manuscript according to your earlier comment.
- *"This highlights the fact that there are some events for which coherence analysis may be inherently unsuitable"* at line 452 of the original manuscript has been changed to *"The earthquake sequence occurred during the dry season in Indonesia, with little rainfall recorded during the month of August (Ferrario, 2019). However, this sensitivity to soil moisture changes means that there are some events for which coherence analysis may be inherently unsuitable,"* in the revised manuscript.

o Figure 5:

▪ This figure would greatly benefit from adding a coherence map. Then we can see the coherence response, and even see how the coherence pixels cover the landslide location. Now it is not transparent.

A time series of coherence map has instead been added to Figure 2 to show how coherence pixels cover the landslide location. Thank you for suggesting this.

▪ From images 18-06-2018 to 01-08-2018 you can see that some of the grasses have been removed. Can the coherence loss be attributed to this vegetation change?

The process that resulted in the coherence loss needs to have taken less than 6 days. Overall, we do not expect vegetation growth or dieback to occur this quickly. Therefore, processes relating to the earthquake are more likely to have resulted in the coherence loss. Agricultural practices (e.g., grass mowing) cannot be ruled out as the source of coherence loss, but they are expected to i) affect a single pair of images and ii) be located where agricultural fields are present. The use of the full

coherence matrix assures that a longer time span is considered. Finally, we underline that the majority of the study area is covered by forest, where vegetation changes due to agriculture are less significant.

▪ If the precursory movement is due to the 28/07, why is the coherence rather low the image before this event as well (element (5,6))? Or, am I interpreting it incorrectly?

This element is fairly low, but others (e.g. 4,6) are not, suggesting this was not a permanent change but was caused by geometric decorrelation/ small difference in atmosphere or soil moisture. This is the reason that we use the full coherence matrix as opposed to the time series of 6-day interferograms alone

❖ NISAR will have a different wavelength than Sentinel-1. This can impose differences and alter the usability of your methodology. This might require elaboration.

We have added new text in revised manuscript to discuss this point:

*“The number of landslides that it is possible to constrain the timing of may improve in the future by incorporating data from planned SAR satellites with regular acquisition strategies such as NISAR and ROSE-L missions (Jones et al., 2021a; Davidson and Furnell, 2021). The longer wavelength of these satellites is likely to improve their landslide detection capacity in forested areas as they will undergo less decorrelation caused by the movement of vegetation (Burrows et al., 2020). However further testing will be needed to establish this.”*

❖ How has this perpendicular baseline effect affected your results? Could it have induced noise?

The main effect is to reduce the number of landslides for which coherence analysis was possible, not to give wrong timings. Landslides for which the coherence matrix is too noisy are not assigned a timing. We have clarified this by added the text in bold to the text at line 175-176 of the revised manuscript.

*“We chose a minimum threshold of 1.5 standard deviations in order to maximise the accuracy of the method. Raising this threshold beyond 1.5 reduced the number of timed landslides without improving the accuracy (Fig. A2). **For this reason, we do not obtain timing information for all landslides**”.*

❖ Were there any rainfall events in your study area during the earthquakes that have affected the results?

Not during the earthquake sequence itself. The earthquake sequence occurred during Indonesia’s dry season and with little recorded rainfall in August (Ferrario, 2019)

*“This highlights the fact that there are some events for which coherence analysis may be inherently unsuitable”* at line 452 of the original manuscript has been changed to *“The earthquake sequence occurred during the dry season in Indonesia, with little rainfall recorded during the month of August Ferrario (2019). However, this sensitivity to soil moisture changes means that there are some events for which coherence analysis may be inherently unsuitable,”* in the revised manuscript.

❖ Figure 6:

o Meaning of the color? Legend required. Which image pairs do these dots indicate?

The legend to this figure has been added in the revised version of the manuscript. The coloured dots show the coherence of pre-event (blue), co-event (orange), post-event (indigo) and unknown (grey) interferograms

❖ Figure 7:

o When did this event occur? Why is there little more consistent higher coherence post-event?

Based on the matrix, this landslide was active in all earthquakes. The low coherence in the post-event pixels is due to geometric decorrelation – these two interferograms had a long perpendicular baseline.

o There is little explanation on Fig. 7b. I think it could use some more elaboration.

New text added at line 451 of the original manuscript “The rainfall event can be seen by plotting the absolute difference in rainfall in the three days before each image used to form an interferogram were acquired (Fig. 8b).” (figure number has changed due to new figure 3 added to revised manuscript)

o X- and y-labels needed for both subplots

X and y labels have been added to the plot

Main comments Conclusion

❖ You mention that this study combines optical and SAR. However, this is not what you mention in the introduction and methods. You use optical as validation, right?

We did use the optical for validation, but here we refer to the fact that the landslides were mapped using optical imagery in the original study of Ferrario (2019) and then SAR data were used to gain information on their evolution in time.

*“This study represents one of the first combined applications of optical imagery and Sentinel-1 amplitude and coherence to depict the multi-stage failure following a sequence of earthquakes.”* At line 474 of the original manuscript changed to *“This study represents one of the first combined applications of optical imagery and Sentinel-1 amplitude and coherence to study landslide multi-stage failure following a sequence of earthquakes”* in the revised manuscript.

Line-by-line comments

Line 3: Adding a timeframe in which the sequence occurred here would be relevant

This information has been added to the revised manuscript: *“during the 2018 Lombok, Indonesia earthquake sequence”* has been changed to *“during an earthquake sequence that occurred over a 23-day period in 2018 in Lombok, Indonesia.”*

Line 5/6: Here you use ‘many’ a lot, I think you should be more accurate and present some percentages.

Around half of the landslides for which we derived timings from coherence were active in more than one earthquake in the sequence.

*“While the majority of new landslides were triggered during the largest earthquake in the sequence on 05/08, we are also able to identify landslide activity associated with other, lower magnitude earthquakes on 28/07, 09/08 and 19/08, with many landslides active in more than one earthquake.”* Changed to *“While the majority of new landslides were triggered during the largest earthquake in the sequence on 05/08, we are also able to identify landslide activity associated with other, lower magnitude earthquakes on 28/07, 09/08 and 19/08, with around half of the landslides studied active in more than one earthquake.”*

Line 8: I find this sentence slightly unclear 'weakening effect' of what? Could probably benefit from some rephrasing

The weakening effect refers to the fact that the presence of landslide scars after an earthquake means there is more unconsolidated material that can then be remobilised by later earthquakes. This is elaborated on further later in the manuscript, we do not feel it is necessary to include it in the abstract.

Line 13-14: I find the meaning of 'significant mass wasting effect' to be a bit unclear

*"significant mass wasting effect" has been changed to "source of erosion" at line 13 of the revised manuscript.*

Line 15: Possible addition: 'In particular, earthquake-induced landslide inventories' to be more precise in which type of landslide inventory you are addressing.

*"landslide inventories" has been changed to "earthquake-triggered landslide inventories" as you suggest.*

Line 24: What do you mean by: 'cumulative effect'?

*This has been removed in response to your next comment.*

Line 24-27: I find this sentence to be a bit unclear. What is the point of this sentence? I would advise to rephrase for clarity.

*"The cumulative effect of such earthquake sequences on rapid, shallow landsliding is difficult to study as it requires satellite images to be acquired between each earthquake, but aftershock-triggered landslides can represent a considerable part of the total landslides for some events (Ferrario, 2019; Tanyas et al., 2022)." At lines 24-27 has been changed to "The evolution of triggered landslides during such earthquake sequences is difficult to study as it requires satellite images to be acquired between each earthquake, but aftershock-triggered landslides can represent a considerable part of the total landslides for some events (Ferrario, 2019; Tanyas et al., 2022)." In the revised manuscript*

Line 31: The references here are not ordered the same as the others, maybe better to add the relevant reference after each earthquake?

*The references here are ordered according to the listed earthquakes*

Line 32-33: The point you mention about medium resolution not being able to capture reactivation or remobilization is not that clear. It now reads like SAR will be able to provide a solution, but how will SAR be able to fix this while the resolution is lower?

*The spatial resolution of SAR is lower but the wavelength is a few cm and the scale of things detectable by SAR is determined by this, not only by the pixel size.*

*"Satellite synthetic aperture radar (SAR) data may offer a solution to this problem as these data can be acquired through cloud cover and are sensitive to landslides." At line 34 of the original manuscript changed to "Satellite synthetic aperture radar (SAR) data may offer a solution to this problem as these data can be acquired through cloud cover and are sensitive to cm-scale movements at the Earth's surface including landslides." At line 34-35 of the revised manuscript*



Line 60-61: 'few landslides were triggered by this earthquake' . I'm wondering where this statement is based on if there is no imagery available. I think it will be helpful to clarify that. *It's based on the cited references and on the limited cloud-free portions of the imagery that was available.*

Line 68: Does these number total to ~15.000 or are the inventories overlapping? It is slightly unclear. The inventories are overlapping, we have revised the text to clarify this.

*"Ferrario (2019) mapped 4823 landslides (with a total area of 4.88 km<sup>2</sup>) following the 05/08 earthquake and 9319 (10.25 km<sup>2</sup>) at the end of the sequence (Fig 1a)."*

Changed to

*"Ferrario (2019) mapped 4823 landslides (with a total area of 4.88 km<sup>2</sup>) following the 05/08 earthquake increasing to 9319 (10.25 km<sup>2</sup>) following the 19/08 earthquakes (Fig 1a)."*

Line 72-73: It is not fully clear if these 991 and 371 landslides are only due to this size threshold, or if there were other factors on which the reduction is based?

We only applied a size threshold. The text has been rewritten to clarify this.

*"For this reason, we limit the amplitude analysis in this study to 991 landslides > 2000 m<sup>2</sup> (following Burrows et al., 2022) and the coherence analysis to 371 landslides > 3600 m<sup>2</sup> (the size of the coherence window in Sect. 2.3)." at line 72 of the original manuscript changed to "For this reason, we limit the amplitude analysis to landslides > 2000 m<sup>2</sup> (following Burrows et al. 2022, 991 events) and the coherence analysis to landslides > 3960 m<sup>2</sup> (the size of the coherence window in Sect. 2.3, 371 events)."*

Equation 2: Slightly unclear what it does, what is i, what is n?

i is each pixel, n is the number of pixels in the boxcar (i.e. the number used in the summation). "i" has been italicised in the revised manuscript in the description of this equation.

Fig. 2: I'm wondering if it might be more useful to add the actual dates to get a better understanding of the temporal baseline as well?

We have not added the dates as it would make the Figure too busy. Since the time interval is consistent throughout (6 days) it is not necessary. This is stated at line 188 of the original manuscript

*"Sentinel-1 collected images every six days on two tracks throughout the earthquake sequence (Fig. 1b)."*

Since we have restructured by swapping the order of section 2.2 and 2.3 according to your earlier comment, this will now be written before the Figure is printed. Hopefully this should make things clearer.

Line 75: Differential InSAR comes a bit out of the blue and maybe should be introduced first?

This paragraph has been deleted following the comments from Reviewer 2.

Line 82-84: Wouldn't this sentence be more appropriate at the end of the introduction? Here you identify that it still has an exploratory aspect.

This paragraph has been deleted following the comments from Reviewer 2.

Line 88-90: I think soil moisture should be added here as well, since it influences the amplitude values.

This line states that “The amplitude of the signal returned to the satellite depends on the scattering properties of the material that this energy interacts with at the Earth’s surface.”

Soil moisture is something that determines the scattering properties along with roughness etc. Therefore, “scattering properties” includes soil moisture already and we do not think it is necessary to change the text here.

Line 91: This seems to contradict your point in line 81 where you mention that there are multiple methodologies for this.

There are multiple methodologies using either SAR amplitude *or* InSAR coherence. Only 2 use SAR amplitude, so line 91 does not contradict line 81.

Line 103: ‘very little prior knowledge on timing’: Although this is a relative statement, I would argue that you have rather a lot of information already, a few months accuracy. I would instead mention this few months accuracy instead of ‘very little’.

*“where very little prior knowledge on landslide timing would be available.”* At line 103 of the original manuscript has been changed to *“where landslide timing can usually only be constrained to within a few months”*

Line 104: ‘are concurrent with one of the earthquakes’: I’m not an expert in earthquake related landslides, but are there no landslides that occur a few days after the shock? There is no doubt whatsoever?

The vast majority of landslides will occur simultaneously with the earthquake (at least when we are using a 6-day temporal resolution to study them. It is possible that a landslide could occur a few days after the shock through progressive failure, particularly if it rained in the days after an earthquake. But the vast majority of landslides will be concurrent with the earthquake, so the assumption is valid.

Line 148: I think it is a bit unclear how this full matrix approach might be able to do that. I think some elaboration is required.

*“Finally, since previous studies have shown that coherence is sensitive not only to the denudation of the hillslope that can be captured by the amplitude method described in Sect. 2.2.1, but also to precursory movements and to movement of material in unvegetated areas, the full matrix approach might be able to reveal multiple failure stages.”*

Changed to *“Finally, previous studies have shown that coherence is sensitive not only to the denudation of the hillslope that can be captured by the amplitude method described in Sect. 2.2.1, but also to precursory movements and to movement of material in unvegetated areas. Thus, coherence might be able to reveal multiple failure stages, with the matrix approach providing a more reliable indicator of landslide activity than pairwise coherence time series”*

Line 155-160: Why is there a difference between the coherence values before and after the earthquake? You use typically and generally, but it is unclear why. For better interpretability I would relate these values to the actual landscape conditions.

The difference is caused by the change in landcover – the bare rock exposed by the landslide has a higher coherence than the pre-event vegetation did.

*“Since both were acquired after the earthquake sequence had ended, and thus after the landslide had occurred, coherence is high.”* At line 155 of the original manuscript changed to *“Since both were*

*acquired after the earthquake sequence had ended, and thus after the landslide had denuded the hillslope, coherence is high.”*

Line 163: ‘has failed more than once’: I’m curious how certain this is? Can it just be noise?

To support this statement, we have divided Figure 2 in the original manuscript into two so that we can show evidence of multi-stage failure in multi-spectral imagery alongside the matrix. We have then added the following text at line 169 of the original manuscript

*“This is supported by multi-spectral satellite imagery acquired over this landslide during the earthquake sequence, in which we first see the loss of vegetation within the landslide scar following the 05/08 earthquake (Fig. 3c) and then see the extent of this denuded area grow following the 19/08 earthquake (Fig. 3d).”*

Line 170-176: I have to admit, that this part is a bit unclear to me. I think this section would benefit some from elaborating a bit more on ‘our analysis’ and how this relates to equation 1.

To make this clearer, we have rewritten lines 170-171 in the original manuscript

*“To make best use of this information, we carried out our analysis in two separate stages: first with the pre-event and co-event image pairs to identify the first failure and then with the co-event and post-event image pairs to identify the final failure.”*

has been rewritten as *“To allow for detection of multi-stage landslide failure, we carried out our analysis in two separate stages: first identifying the first failure timing that minimises the residuals (Eq. 1) when dividing the pre-event and co-event image pairs and then repeating this with the co-event and post-event image pairs to identify the final failure timing.”*

Line 195: This first sentences seems unnecessary

*“In Sect. 3, we present the landslide timing results obtained from the SAR amplitude and coherence methods described in Sect. 2.2. In order to validate these results, we compare with the timing information that can be obtained from optical and multi-spectral images acquired during the earthquake sequence.”* (lines 195-197 of original manuscript) has been rewritten as

*“In order to validate the landslide timing information derived from SAR, we compare with the timing information that can be obtained from optical and multi-spectral images acquired during the earthquake sequence.”* Deleting the first sentence

Line 201-203: This use of optical data contradicts your initial statement that optical data is not relevant for timing detection here. I think that requires some rephrasing

*“In some cases, we were then able to further constrain the timing using cloud-free areas of multi-spectral Sentinel-2 and Planet images and high-resolution optical images in Google Earth Explorer”*

At lines 201-202 has been changed to *“In areas that were cloud-free in Planet, Sentinel-2 or Google Earth images acquired between the 28/07 and 05/08 or the 09/08 and 19/08, we were able to carry out a more precise validation.”* To make this clearer

Line 204: ‘Second, many landslides fail more than once’: How do you know this? This has not really been clearly presented in the inventory section.

*"This change in total area includes landslides polygons mapped on 05/08 that grew in size in the final inventory, indicating landslides that failed more than once during the sequence."* Has been added to the inventory section at line 69 of the original manuscript.

Line 211: 'fitted' what does this mean? Little unclear

We mean the shape of the landslide visible in Google Earth or Sentinel-2 is better delineated by the 05/08 polygon. To clarify this, *"fitted by"* has been changed to *"delineated by"*

Line 227: 'represent the main failure' Why is that? I think this could use some elaboration

This was described at line 219. We have made the following change to clarify that at line 227 (and elsewhere) we use "main" failure to refer to the largest change in area of the landslide polygon.

*"SAR timings derived from amplitude (Sect. 2.3.1), which primarily detect denudation of the hillslope were assessed against the timing of the largest failure by area in the optical images."* At line 219 of the original manuscript changed to *"SAR timings derived from amplitude (Sect. 2.3.1), which primarily detect denudation of the hillslope were assessed against the timing of the largest failure by area in the optical images (referred to as the "main" failure)."*

Table 1: you use 05/07 instead of 05/08 for optical timing

Thank you for identifying this mistake, this has been corrected in the revised manuscript.

Line 239-244: While you present the same type of results, you do it differently (with/without percentages/ different way of telling it). I think it is better readable if there is a similar structure.

*"Of these, 19 initiated during the earthquake on 28/07, 40 on 05/08, none on 09/08 and 2 on 19/08."* Has been changed to *"This was the 28/07 earthquake in 19 cases (31%), 05/08 in 40 cases (66%) and 19/08 in 2 cases (3%)."* To better match the following sentence and improve readability as you suggest.

Line 246: At first, this number (153 of the 213) confused me a little bit since you first say 61 and then 213, but I see now that you mean difference between optical and SAR. I think this should be clarified.

Yes, we were comparing optical and SAR

*"Overall, the two timings agree for 153 of the 213 landslides (72%, Table 1)"*

At line 246 of the original manuscript has been changed to *"Overall, the final failure timing agrees with the optical imagery for 153 of the 213 landslides (72%, Table 1)"* in the revised manuscript to make this clearer

Line: 258: '214' should be 213, right?

Yes that is correct, this has been corrected in the revised manuscript

Line 258: '170' where does this value come from? In sect 3.1 you mention 307. Or, is this only for the >3600 m2 landslides?

Yes 170 refers only to the landslides > 3960 that we have done the coherence analysis on.

*"From the amplitude methods, we have timing information for 170 landslides"* at line 258 of the original manuscript has been changed to

*"From the amplitude methods, we have timing information for 170 landslides > 3960 m2"*

Line 260: First mention of the figure 3 is Fig 3.f shouldn't it be Fig. 3.a then?

The labelling of the panels is designated by their location in the figure, we cannot change panel f to panel a without reorganising the figure.

Line 265-266: I think this statement requires backup in the form of results or supplementary material for transparency.

To support this statement, we have added Figure 3 to the revised manuscript and added a reference to it here.

Line 272: Is it 259 or 258 (as in line 261).

This should have been 258, we have corrected it. Thank you for noticing this mistake.

Line 296: '2.5cm/s' Even lower right? 2.1/2/2 Yes correct, 2.1 would be a better value since the lowest is 2.07. We have corrected this in the revised manuscript

Line 299: degree sign needs to be changed

The degree sign has been changed in the revised manuscript

Line 345-346: References should be between brackets? Ending with a full stop

This has been corrected in the revised manuscript

Line 350-351: I think this statement should be backed-up by some reasoning.

To better back up this statement, we have added the text in bold in the revised manuscript

*"Overall, we believe that the earthquakes on 09/08 and 19/08 resulted in more landslide activity than they would have done had they not been part of the sequence, **since activity associated with these earthquakes occurred at low PGV (Fig. 4b)**"*

Line 359-360: This sentence seems a bit unclear? Don't you mean to say that the spatial extent is already defined by the landslides that occurred in the main shock? Maybe some rephrasing is needed.

*"However, since this activity takes the form of reactivations rather than new failures, its spatial extent is controlled by the shaking intensity experienced in the mainshock" at line 359-360 of the original manuscript has been changed to "However, since this activity takes the form of reactivations rather than new failures, its spatial extent is determined by the locations of triggered landslides, and thus shaking intensity associated with the mainshock" in the revised manuscript*

Line 362 & 367: What do you mean by 'mass wasting effect'? amount of regolith mobilized?

Yes we mean the total volume eroded by the landslides. *"Mass wasting effect"* has been changed to *"erosional effect"* to make this clearer

Line 381-384: You say it is 'particularly likely' but why is that?

We have rephrased this sentence to remove "particularly likely"

*"This is particularly likely for the 6 landslides that were not visible until 05/08 in the optical imagery, but were detected as failing on both 28/07 and 05/08 by the coherence matrix; and for the 4 landslides that were mapped in the second half of the sequence by Ferrario (2019), but were active in every earthquake according to the coherence matrix." Has been changed to "These 12 landslides*

*include 6 that were not visible until 05/08 in the optical imagery, but were detecting as failing on both 28/07 and 05/08 by the coherence matrix; and 4 that were mapped in the second half of the sequence by Ferrario (2019), but were active in every earthquake according to the coherence matrix.”*

Line 388: Instead of reactivations, could noise be a factor?

The optical data alone is not sufficient to assess whether these are noise rather than reactivations. We have added the following text at line 390 of the original manuscript to discuss this:

*“To confirm that these are indeed reactivations, comparison against a different dataset, such as field surveys, ground-based SAR or high resolution DEMs would be necessary, but this is beyond the scope of this study.”*

Line 444: I think this should be included as a reference, right? We have added this as a reference rather than a url in the revised manuscript
